# Supplementary material
Source: Elsevier journal article supplement (https://www.sciencedirect.com/science/article/pii/S2254887420301181)
Supplement: mmc1 [file S2254887420301181:mmc1.pdf]

## Supplemental material

### References:

1. General Office of National Health Commission, General Office of National Administration of Traditional Chinese Medicine. Diagnostic and treatment protocol for novel coronavirus pneumonia (Trial version 5, revised form). 2020. Available at [http://www.gov.cn/zhengce/zhengceku/2020-02/09/content\\_5476407.htm](http://www.gov.cn/zhengce/zhengceku/2020-02/09/content_5476407.htm).
2. European Center for Disease Prevention and Control. Discharge criteria for confirmed COVID-19 cases – When is it safe to discharge COVID-19 cases from the hospital or end home isolation? 2020. Available at <https://www.ecdc.europa.eu/sites/default/files/documents/covid-19-rapid-risk-assessment-coronavirus-disease-2019-eighth-update-8-april-2020.pdf>.
3. Zhang T, Cui X, Zhao X, Wang J, Zheng J, Zheng G, et al. Detectable SARS-CoV-2 Viral RNA in Feces of Three Children during Recovery Period of COVID-19 Pneumonia. *J Med Virol* 2020. doi: 10.1002/jmv.25795.
4. Xiao AT, Tong YX, Zhang S. False-negative of RT-PCR and prolonged nucleic acid conversion in COVID-19: Rather than recurrence. *Journal of Medical Virology*. Available at <https://doi.org/10.1002/jmv.25855>.
5. Li Y, Hu Y, Zhang X, Yu Y, Li B, Wu J, et al. Follow-up testing of viral nucleic acid in discharged patients with moderate type of 2019 coronavirus disease (COVID-19). *Zhejiang Da Xue Xue Bao Yi Xue Ban* 2020;49(1):0.
6. Luo A. Positive SARS-Cov-2 test in a woman with COVID-19 at 22 days after hospital discharge: A case report. *Journal of Traditional Chinese Medical Sciences* 2020. doi: 10.1016/j.jtcms.2020.04.001.
7. Hu F, Chen F, Wang Y, Xu T, Tang X, Li F. Failed detection of the full-length genome of SARS-CoV-2 by ultra-deep sequencing from the recovered and discharged patients retested viral PCR positive. *medRxiv*. Available at <https://doi.org/10.1101/2020.03.27.20043299>.
8. Zhou F, Yu T, Du R, Fan G, Liu Y, Liu Z, et al. Clinical course and risk factors for mortality of adult inpatients with COVID-19 in Wuhan, China: a retrospective cohort study. *Lancet*. 2020;395(10229):1054-1062. doi: 10.1016/S0140-6736(20)30566-3.

9. Cai J, Xu J, Lin D, Yang Z, Xu L, Qu Z, et al. A Case Series of children with 2019 novel coronavirus infection: clinical and epidemiological features. *Clin Infect Dis* 2020. pii: ciaa198. doi: 10.1093/cid/ciaa198.
10. Hu F, Chen F, Wang Y, Xu T, Tang X, Li F. Failed detection of the full-length genome of SARS-CoV-2 by ultra-deep sequencing from the recovered and discharged patients retested viral PCR positive. *MedRxiv*. Available at <https://doi.org/10.1101/2020.03.27.20043299>.
11. Bao L, Deng W, Gao H, Xiao C, Liu J, et al. Reinfection could not occur in SARS-CoV-2 infected rhesus macaques. *BioRxiv*. Available at <https://doi.org/10.1101/2020.03.13.990226>.
12. Li Y, Yao L, Li J, Chen L, Song Y, Cai Z, et al. Stability issues of RT-PCR testing of SARS-CoV-2 for hospitalized patients clinically diagnosed with COVID-19. *J Med Virol* 2020. doi: 10.1002/jmv.25786.
13. Hao, Q. et al. 2020. Difficulties in False Negative Diagnosis of Coronavirus Disease 2019: A Case Report. *Infectious Diseases - Preprint [online]*,pp.1–12. Available at <https://www.researchsquare.com/article/rs-17319/v1>.
